# Supplementary material for: JNets: Exploring networks by integrating annotation
Source: Springer Nature journal article supplement (doi:10.1186/1471-2105-10-95), 2009-03-26
Supplement: 12859_2008_2825_MOESM3_ESM.pdf [file 12859_2008_2825_MOESM3_ESM.pdf]

## Create Subgroup From Group: Approved Drug Target

- Automatic subgroup using a single annotation
- Create a subgroup manually by filtering annotation(s)

- Make node group only
- Make edge group only
- Group edges and nodes

New group names:

Targets to immunosuppressant agents

<N/A>

Some useful separators:

And

Or

(

)

Add

Delete

Select Element Type:

Node Data

Select Annotation:

Taxa

Select Constraint:

not equal to

Enter Limit:

11676

Your Choices:

ATC level 2 is equal to L04  
OR  
Drug Class contains immunosuppressant  
AND  
Taxa is not equal to 11676

OK

Cancel
