# Supplementary material for: JNets: Exploring networks by integrating annotation
Source: Springer Nature journal article supplement (doi:10.1186/1471-2105-10-95), 2009-03-26

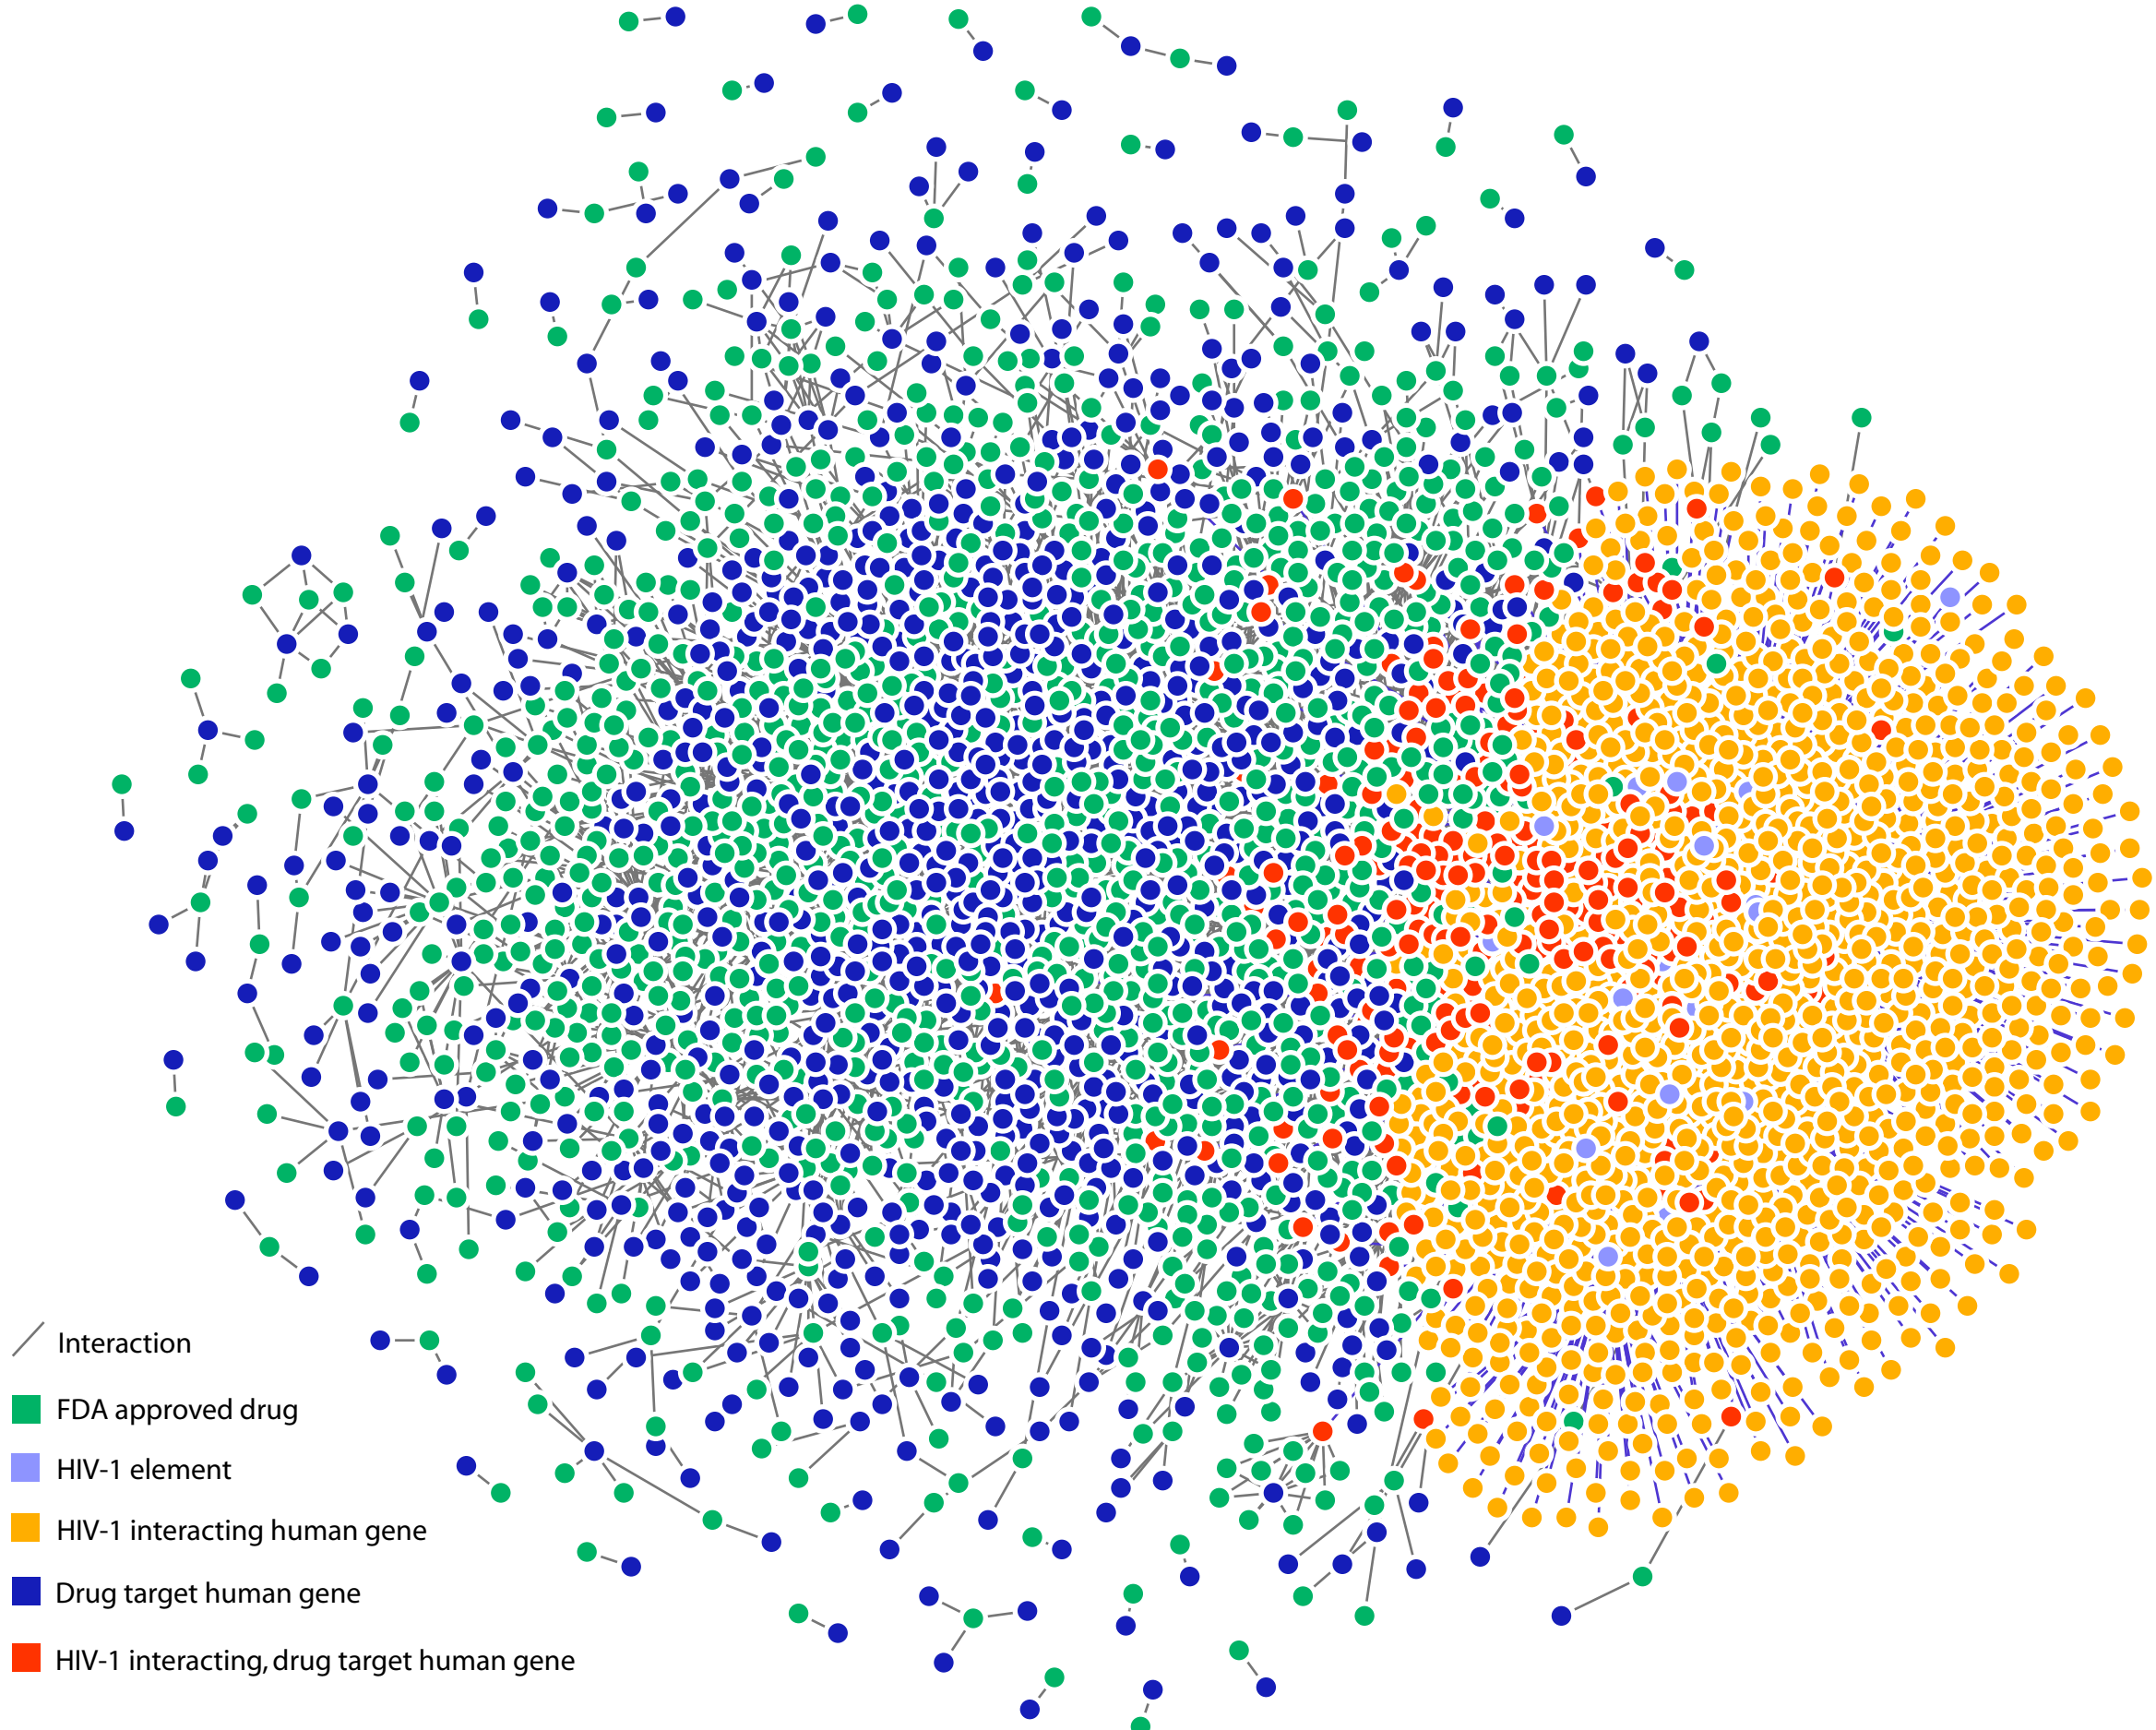

Supplement: 12859_2008_2825_MOESM4_ESM.pdf [file 12859_2008_2825_MOESM4_ESM.pdf]
