# Supplementary material for: JNets: Exploring networks by integrating annotation
Source: Springer Nature journal article supplement (doi:10.1186/1471-2105-10-95), 2009-03-26
Supplement: 12859_2008_2825_MOESM5_ESM.pdf [file 12859_2008_2825_MOESM5_ESM.pdf]

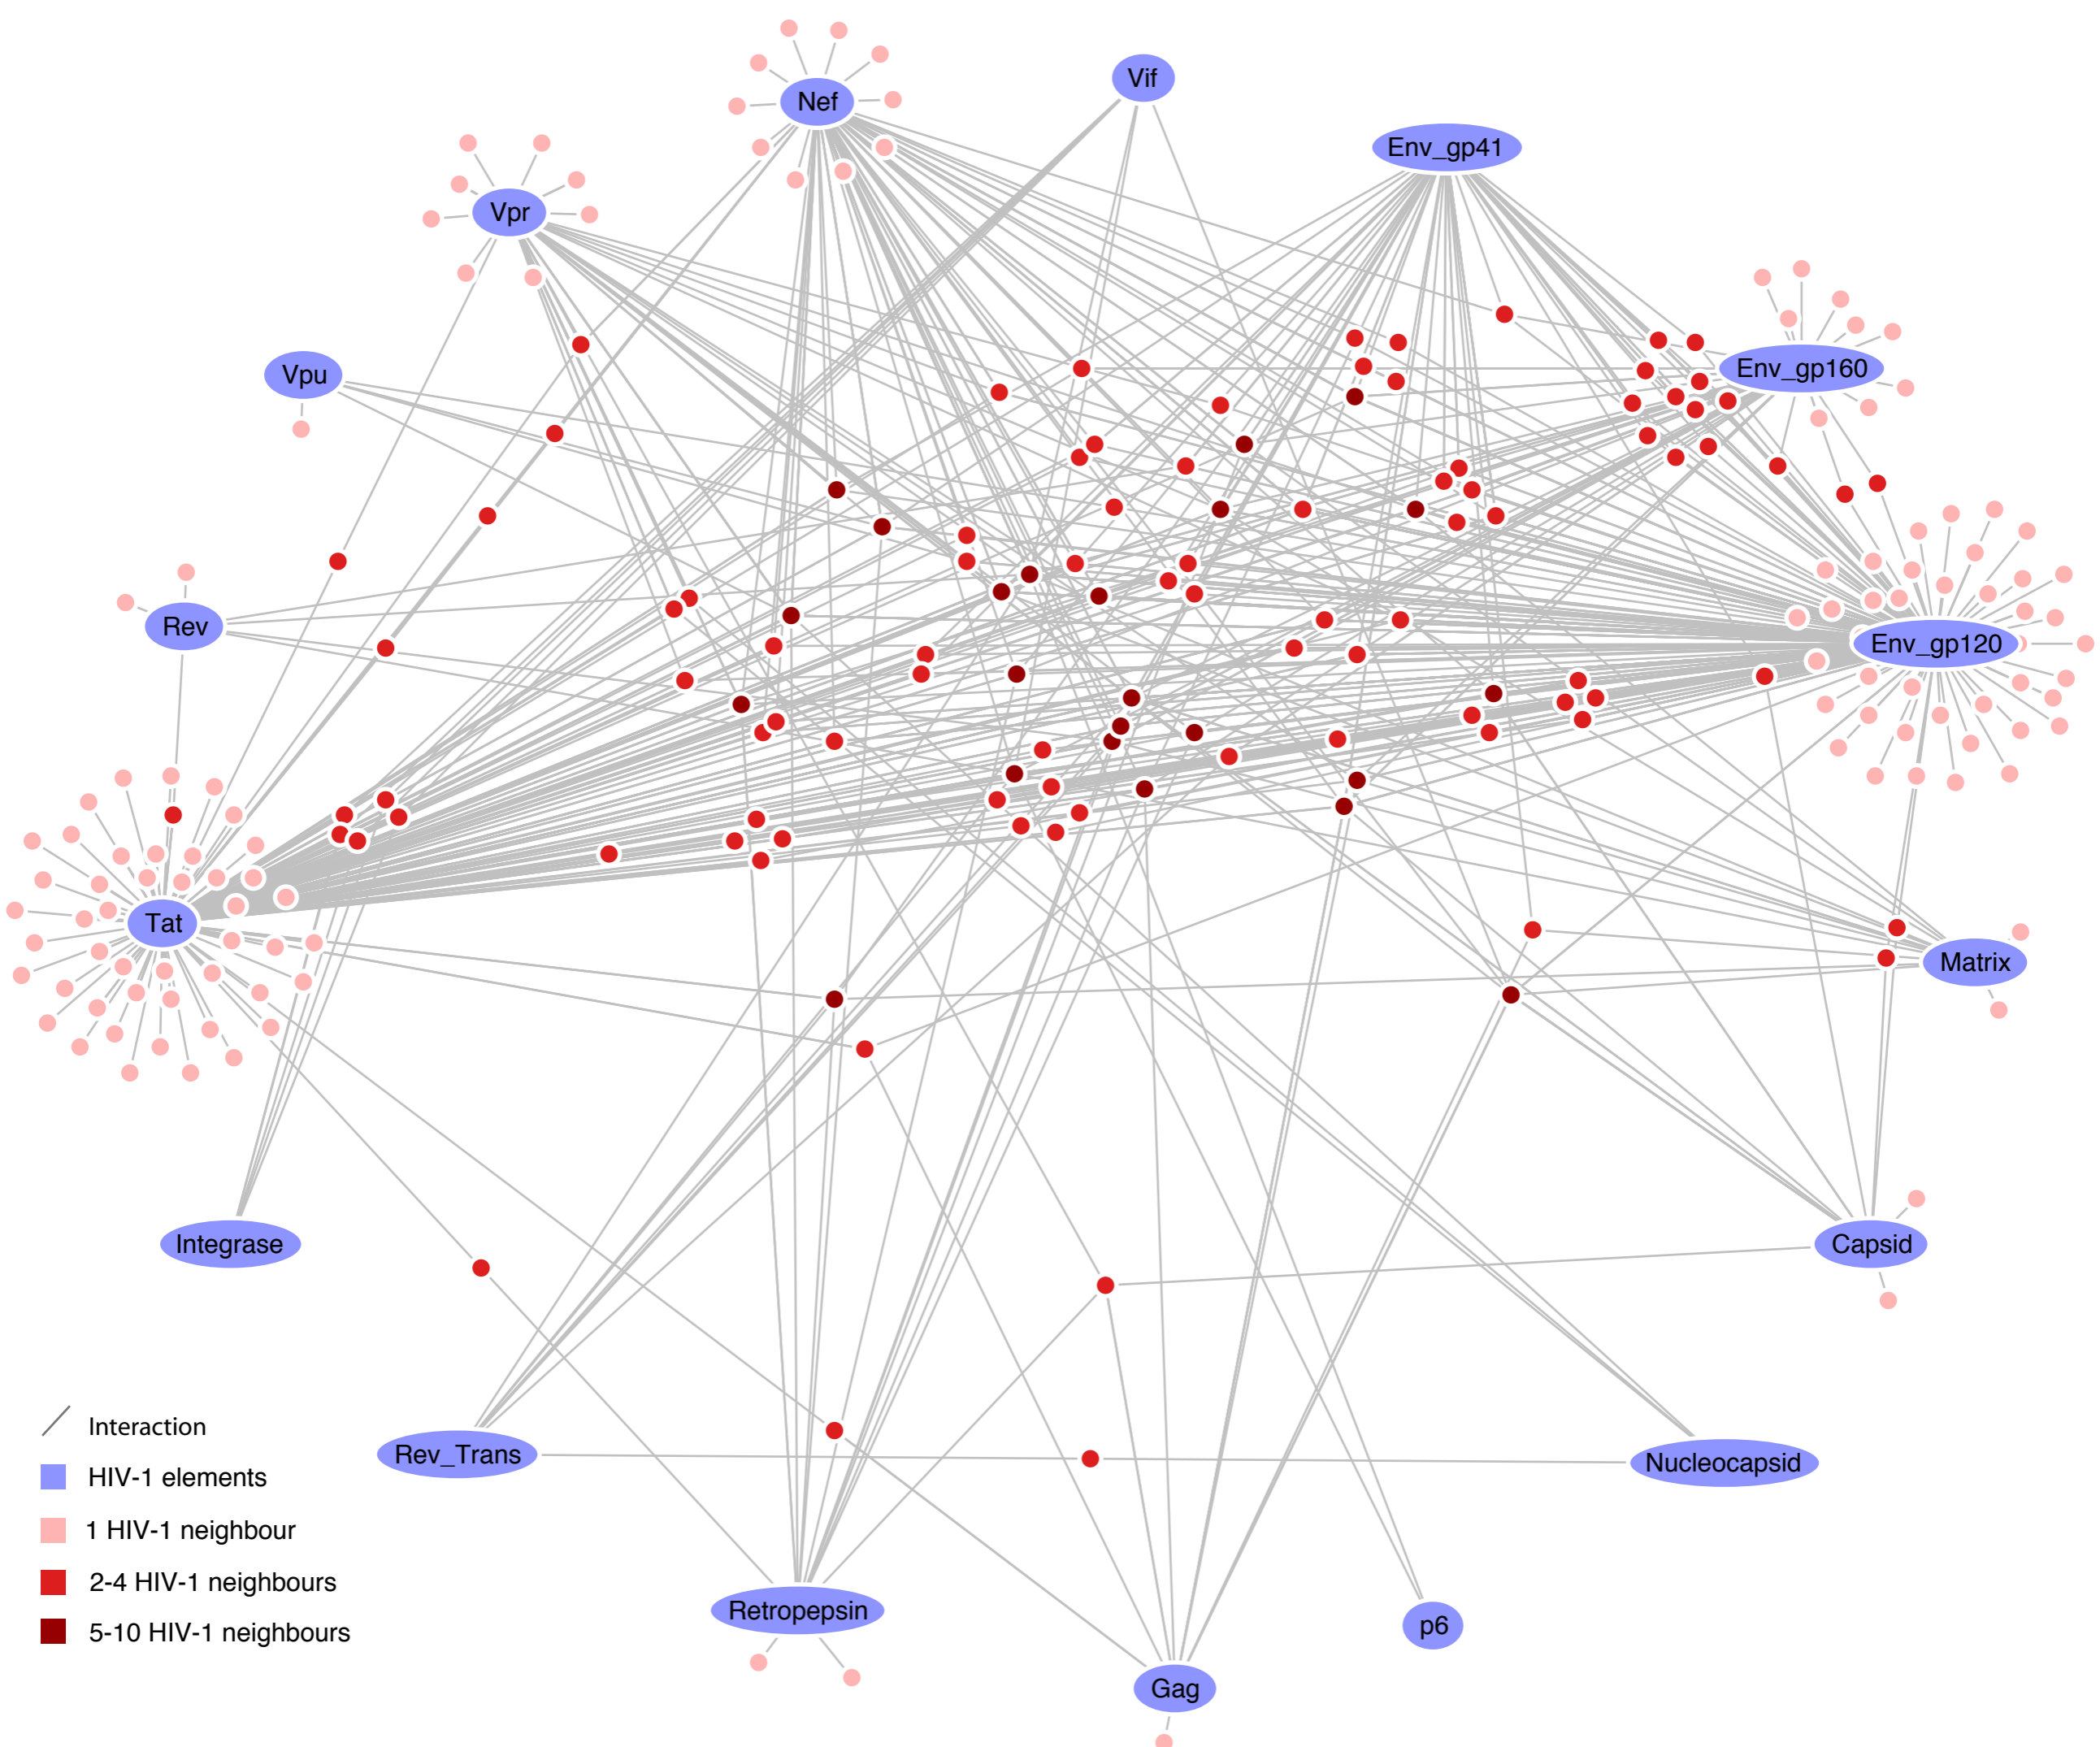

- Interaction
- HIV-1 elements
- 1 HIV-1 neighbour
- 2-4 HIV-1 neighbours
- 5-10 HIV-1 neighbours
