# Supplementary material for: JNets: Exploring networks by integrating annotation
Source: Springer Nature journal article supplement (doi:10.1186/1471-2105-10-95), 2009-03-26

- Interaction
- FDA approved drug
- HIV-1 element
- Agonized and antagonized
- Agonized
- Antagonized
- Neutral/unspecific

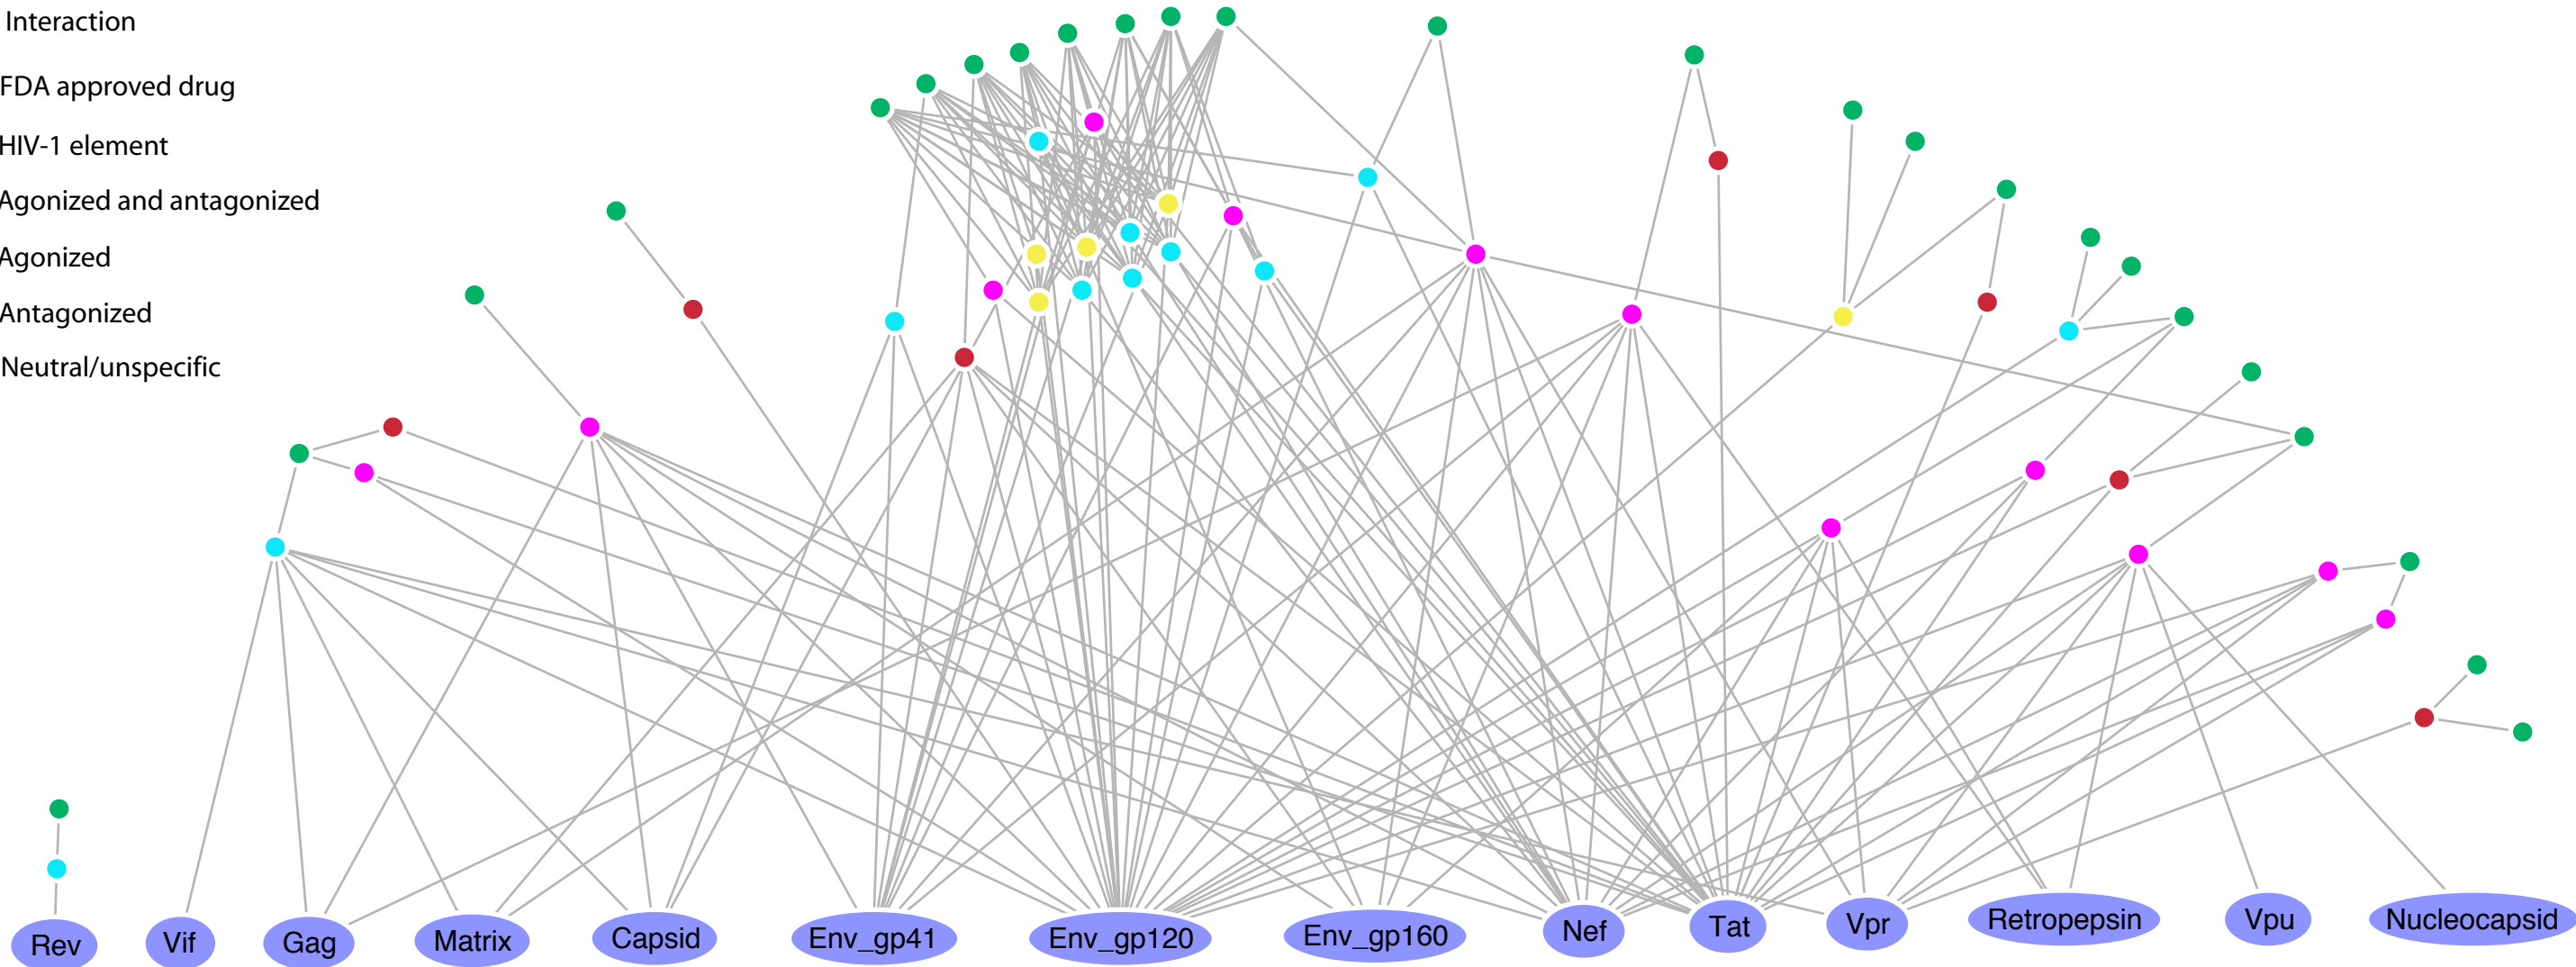

Supplement: 12859_2008_2825_MOESM6_ESM.pdf [file 12859_2008_2825_MOESM6_ESM.pdf]
